# Supplementary figures and images for: A Semi-Automatic Approach for Holistic 3D Assessment of Temporomandibular Joint Changes
Source: MDPI journal article supplement (doi:10.3390/jpm13020343), 2023-02-16

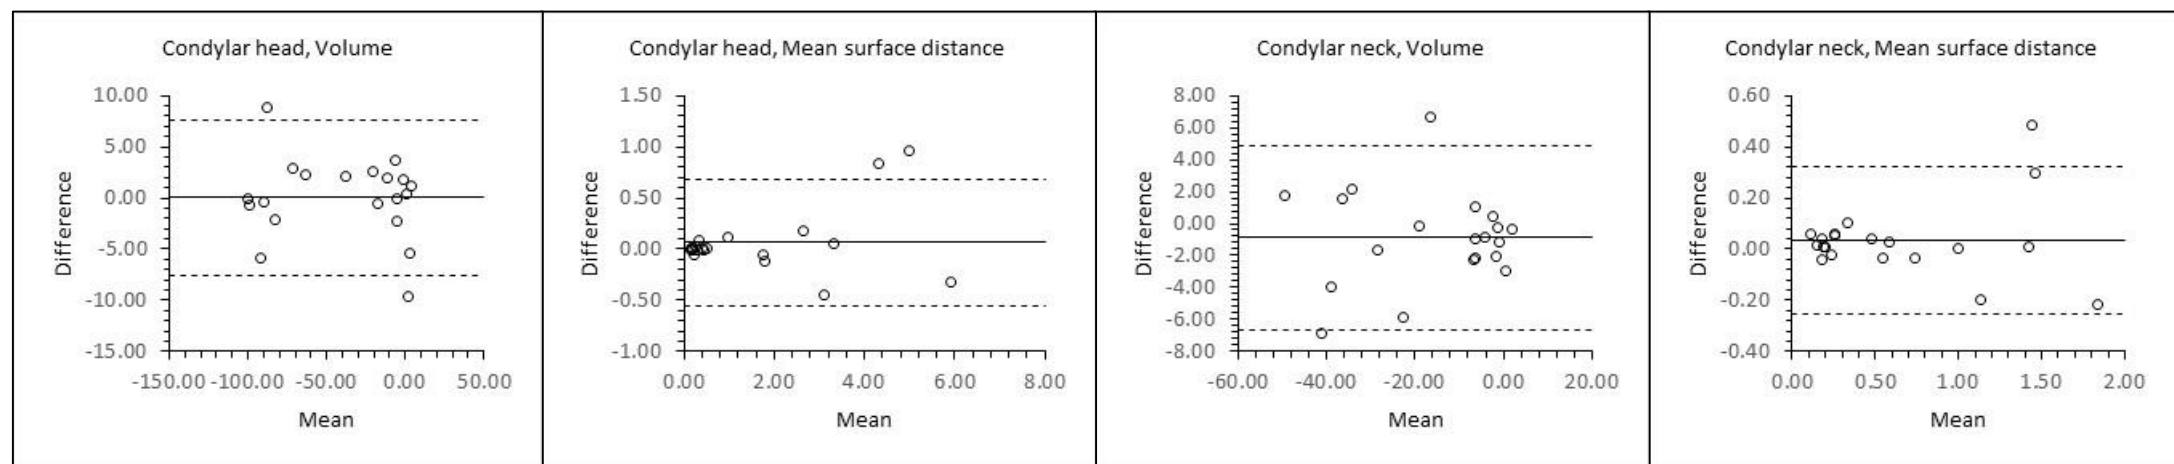

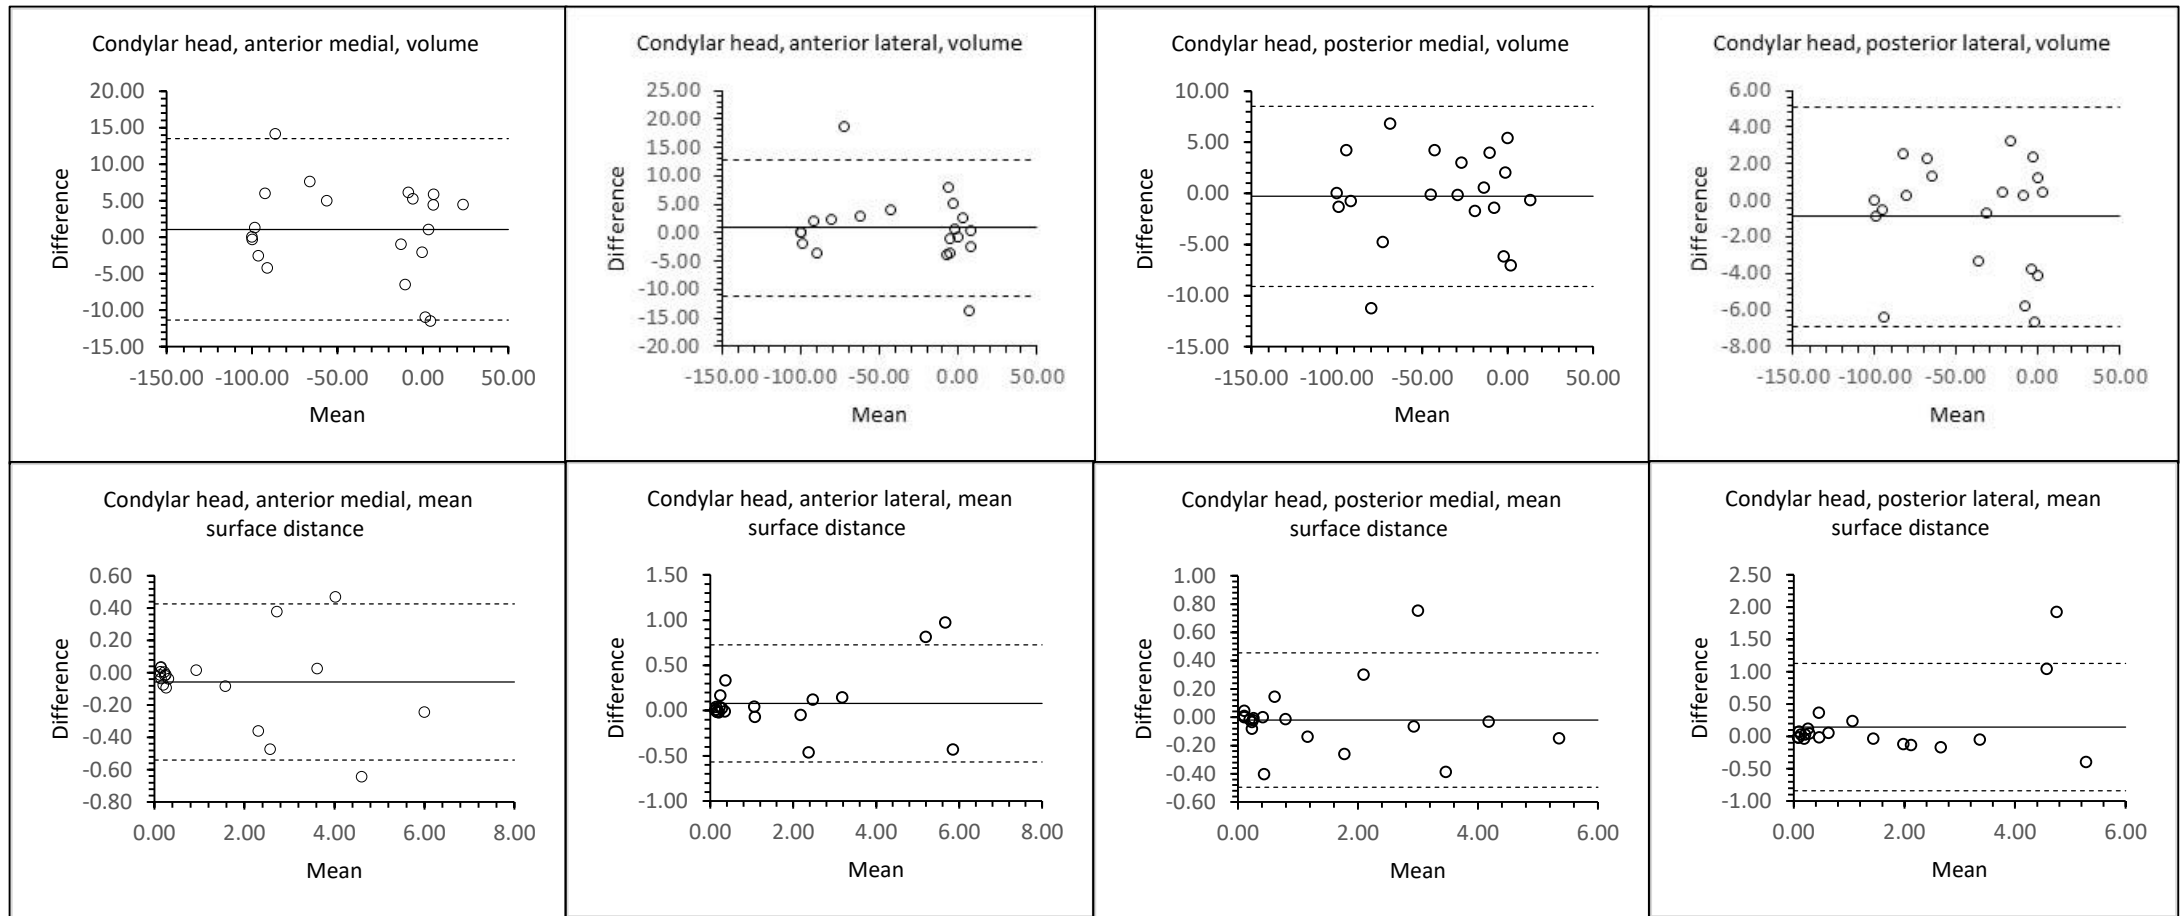

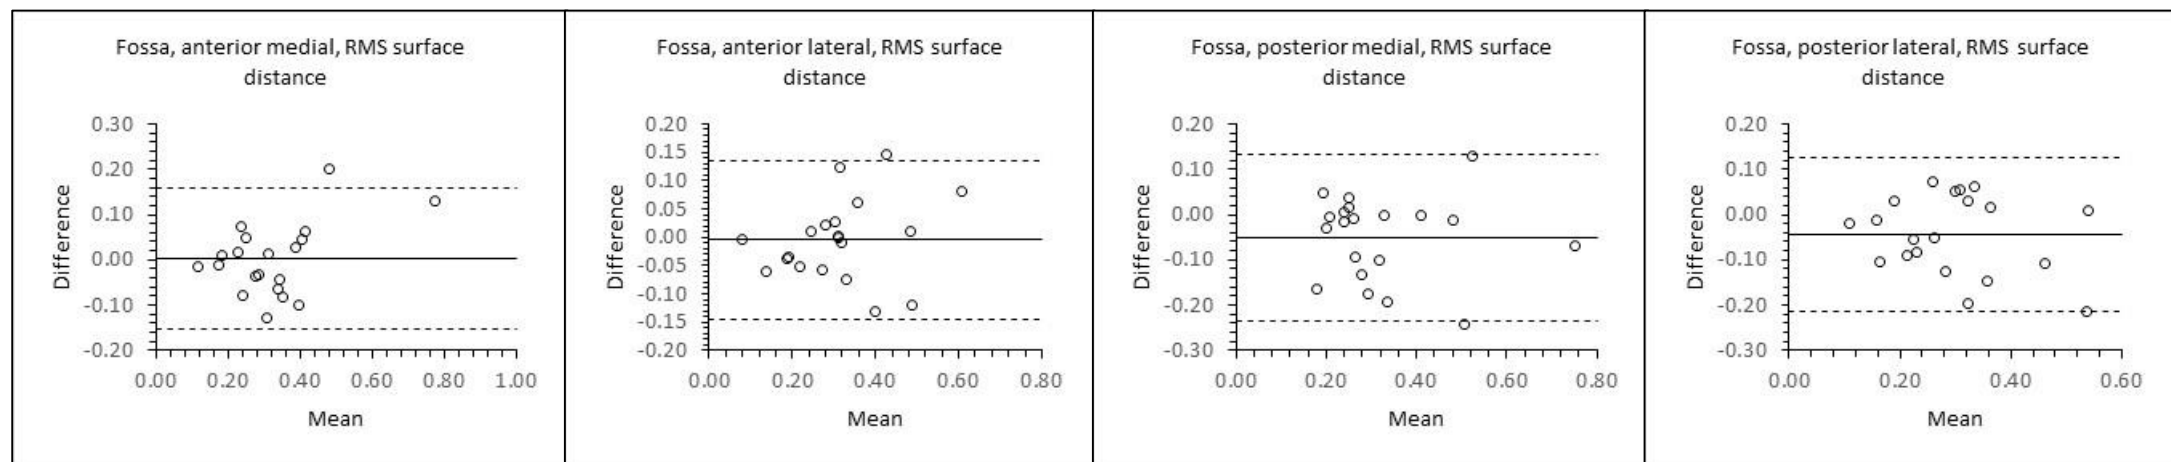

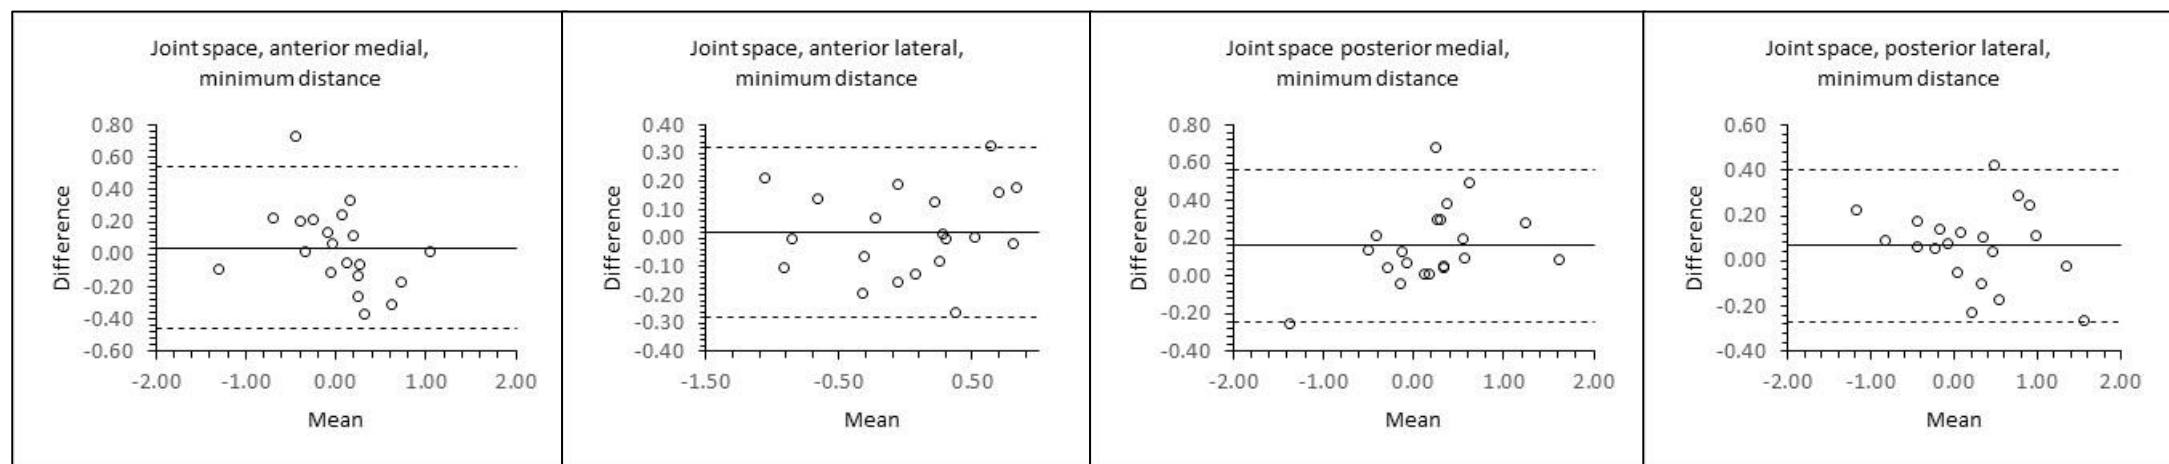

Supplement: s1 [file s1]
